# Supplementary material
Source: publisher figshare collection journal article supplement (https://acs.figshare.com/ndownloader/files/9440797)

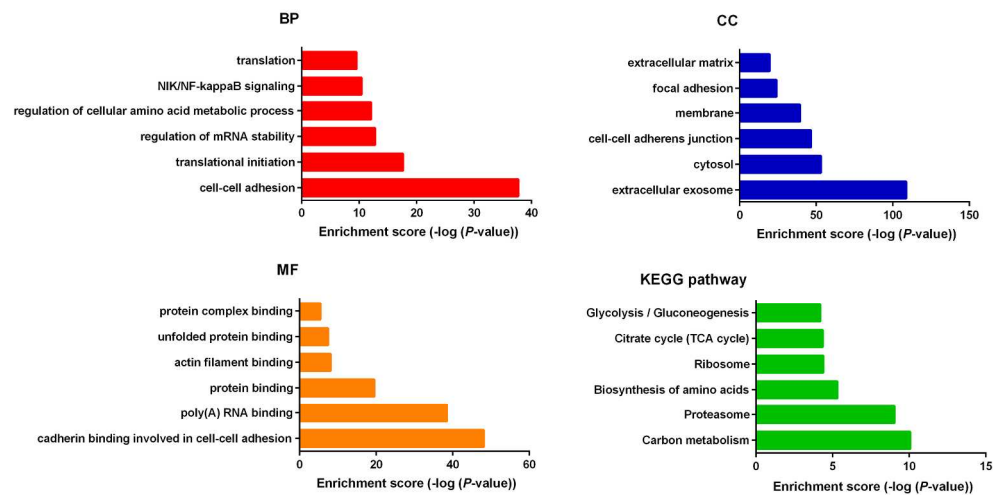

232x117mm (300 x 300 DPI)

Supplement: Supplementary file 1 [file 9440797]
